# Supplementary material for: Potential pitfalls in the accuracy of analysis of natural sense-antisense RNA pairs by reverse transcription-PCR
Source: PubMed Central journal article supplement (PMC1876213; doi:10.1186/1472-6750-7-21), 2007-05-04

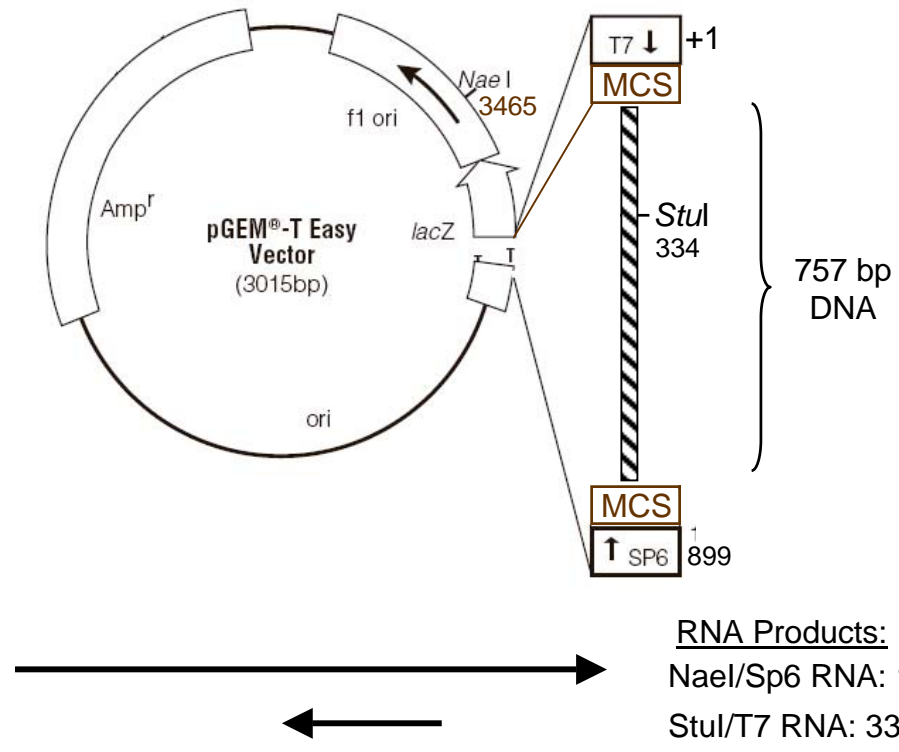

Supplement: 1472-6750-7-21-S2.pdf [file 1472-6750-7-21-S2.pdf]
