# Supplementary material for: Potential pitfalls in the accuracy of analysis of natural sense-antisense RNA pairs by reverse transcription-PCR
Source: PubMed Central journal article supplement (PMC1876213; doi:10.1186/1472-6750-7-21), 2007-05-04
Supplement: 1472-6750-7-21-S3.pdf [file 1472-6750-7-21-S3.pdf]

|                                                                 | 1) +RT primer, +enzyme                                                                                                                                             |                                                                                         | 2) +RT primer, -enzyme                                                                                                                    |                                                                                                                                                    | 3) -RT primer, +enzyme                                                                                                                                                         |                                                                                                                                                     |
|-----------------------------------------------------------------|--------------------------------------------------------------------------------------------------------------------------------------------------------------------|-----------------------------------------------------------------------------------------|-------------------------------------------------------------------------------------------------------------------------------------------|----------------------------------------------------------------------------------------------------------------------------------------------------|--------------------------------------------------------------------------------------------------------------------------------------------------------------------------------|-----------------------------------------------------------------------------------------------------------------------------------------------------|
| RNase H <sup>-</sup><br>or<br>RNase H <sup>+</sup><br>RT enzyme | <b>A: Standard Condition.</b><br>Denature RNA+primer at 70°C, add RT reagents and preincubate at 44°C for 3', add enzyme, incubate at 44°C for either 30 or 50 min | <b>B: Modified Condition.</b><br>Assemble reactions on ice, incubate at 50°C for 30 min | <b>A: Standard Condition.</b><br>Denature RNA+primer at 70°C, add RT reagents except the enzyme, incubate at 44°C for either 30 or 50 min | <b>B: Modified Condition.</b><br>Assemble reactions on ice by adding all reagents, RNA, and primers except the enzyme, incubate at 50°C for 30 min | <b>A: Standard Condition.</b><br>Denature RNA at 70°C, add RT reagents and except the primer, preincubate at 44°C for 3', add enzyme, incubate at 44°C for either 30 or 50 min | <b>B: Modified Condition.</b><br>Assemble reactions on ice by adding all reagents, RNA, and enzyme except the, primers, incubate at 50°C for 30 min |
