# Supplementary material for: Potential pitfalls in the accuracy of analysis of natural sense-antisense RNA pairs by reverse transcription-PCR
Source: PubMed Central journal article supplement (PMC1876213; doi:10.1186/1472-6750-7-21), 2007-05-04
Supplement: 1472-6750-7-21-S4.pdf [file 1472-6750-7-21-S4.pdf]

| Target                                      | RT-PCR primers: 5'→3'                                              | PCR product size (bp) | Reference figure                                     |
|---------------------------------------------|--------------------------------------------------------------------|-----------------------|------------------------------------------------------|
| 18S rRNA                                    | Fwd: AGGAATTGACGGAAGGGCAC<br>Rev: GTGCAGCCCCGGACATCTAAG            | 324                   | PCR in <b>Additional file 1</b>                      |
| 5'end of the ACTA ( $\alpha$ sk actin) gene | Fwd: GGCTGGGGGAGAGGAGTGT<br>Rev: CCCTGGGGGCATCATCC                 | 210                   | PCR in <b>Additional file 1</b>                      |
| Antisense MYH7 RNA (5'end of gene)          | TCACGTAGTACCAGGTTATTATTG                                           |                       | RT primer in Figures 1 and 3a at 44°C                |
| Sense MYH7 RNA (5'end of gene)              | CATGTA CTGATAGGCGTTGTC                                             |                       | RT primer in Figures 1                               |
| 5'end of MYH7 gene                          | Fwd: GCCTGGGCCTACCTCTTTATCC<br>Rev: GTACGCCGCTTCCACCAC             | 425                   | PCR in Figures 1, <b>Additional file 1</b> , 3 and 4 |
| 3'end of MYH6 gene                          | Fwd: TCCTGCCCTCGAATTACCAGTCAT<br>Rev: ATAGCAACAGCGAGGCTCTTTCTG     | 399                   | PCR in <b>Additional file 1</b>                      |
| 3'end of MYH7 gene                          | Fwd: AGCCAGGCCTGCTACCAAAGACACC<br>Rev: CCCCAGAACACCACGGAGCAT       | 284                   | PCR in Figures 3b, 4a, and 4c                        |
| Sense MYH4 RNA (3'end of gene)              | CTTTGGTCACATTTTCTTTCATTAG                                          |                       | RT primer (N) in Figures 3 and 4                     |
| Sp6 RNA                                     | GAGAAAGGAAGGGAAGAAAG                                               |                       | RT primer P1 in Figure 2                             |
| Sp6 RNA                                     | TGTATAGGGCATATCTCTGGTG                                             |                       | RT primer P2 in Figure 2                             |
| PCR1 <i>in vitro</i> Sp6 RNA                | Fwd: ATTACAATTCAC TGGCCGTCGTTTTAC<br>Rev: CTAGGGCGCTGGCAAGTGTAGC   | 248                   | PCR1 in Figure 2                                     |
| PCR2 <i>in vitro</i> Sp6 RNA                | Fwd: GCCAGGCCTGCTACCAAAGACAC<br>Rev: GATCGGAACACCACGGAGCATAAAC     | 283                   | PCR2 in Figure2                                      |
| PCR3 <i>in vitro</i> Sp6 RNA                | Fwd: CTGGCCCAGAAGAGCATGACTGAGTT<br>Rev: GAGGGTACATGTCAAGGGGGAACACA | 245                   | PCR3 in Figure 2                                     |
